# Supplementary material
Source: PubMed Central journal article supplement (PMC2590746)
Supplement: tpc.108.062166_1.pdf [file tpc.108.062166_1.pdf]

Supplemental Data. Mandáková and Lysak (2008).  
 Chromosomal phylogeny and karyotype evolution in  $x=7$  crucifer species (*Brassicaceae*).

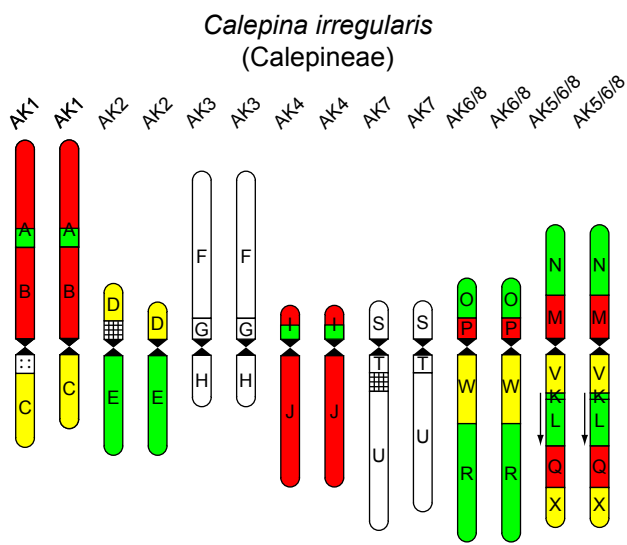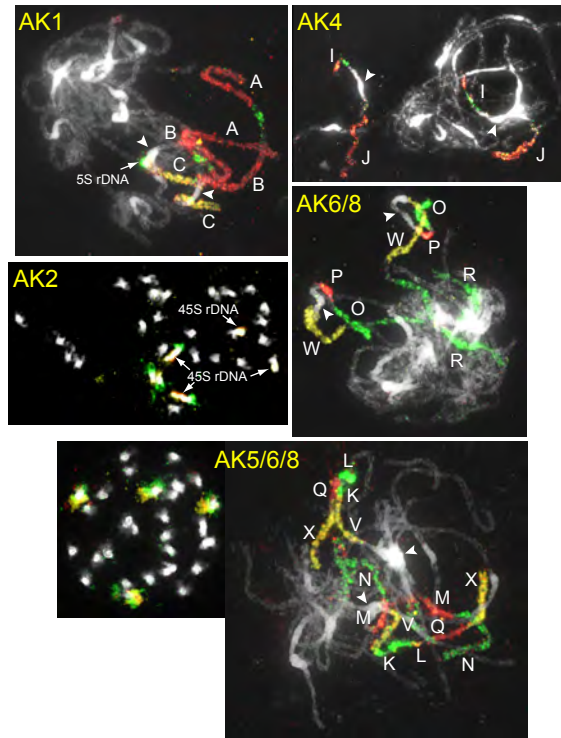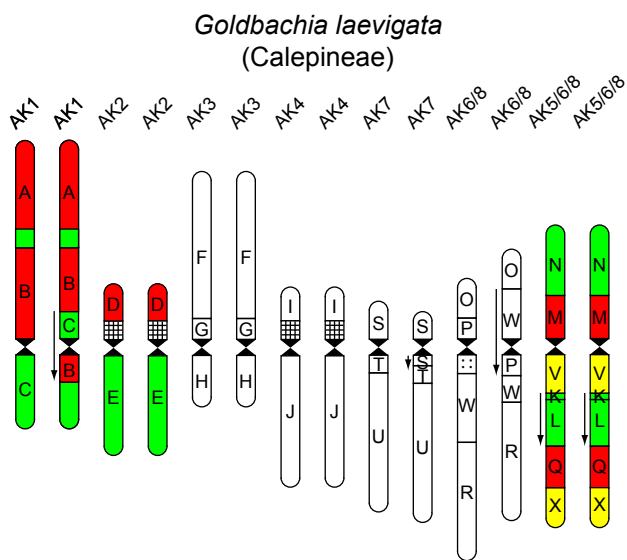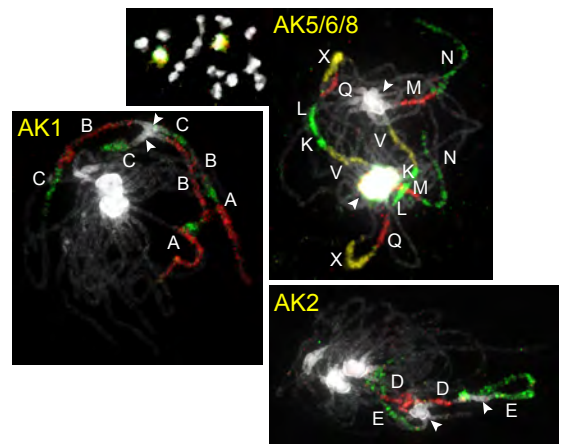

**Supplemental Figure 1. Examples of Comparative Chromosome Painting in Tetraploid Calepineae Species ( $2n=4x=28$ ).** 24 genomic blocks of the ACK are indicated by capital letters (A-X), and colored according to the experimental design used (green, yellow and red pseudocolors correspond to the fluorescence of AlexaFluor 488, Cy3 and Texas Red, respectively). Downward-pointing arrows indicate the opposite orientation of genomic blocks as compared to the position in the ACK. 5S rDNA and 45S rDNA loci are shown as dotted and cross-hatched boxes, respectively. Arrowheads point to the centromere position(s) on pachytene chromosomes.

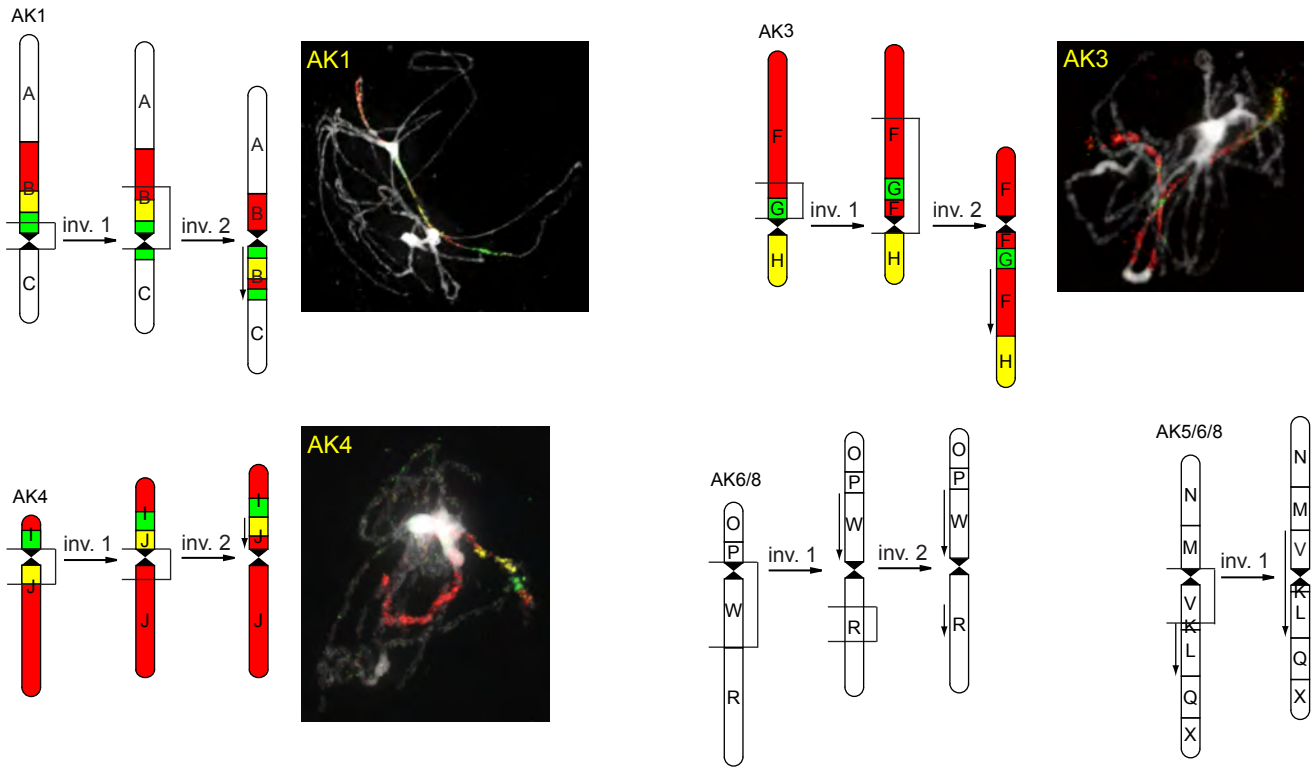

**Supplemental Figure 2. Species-specific Chromosome Rearrangements (Inversion Events) in *Nocca caerulea*.** 24 genomic blocks of the ACK are indicated by capital letters (A-X), and colored according to the experimental design used (green, yellow and red pseudocolors correspond to the fluorescence of AlexaFluor 488, Cy3 and Texas Red, respectively). Downward-pointing arrows indicate the opposite orientation of genomic blocks as compared to the position in the ACK. Painted chromosomes AK6/8 and AK5/6/8 shown in Figure 2D.

**A**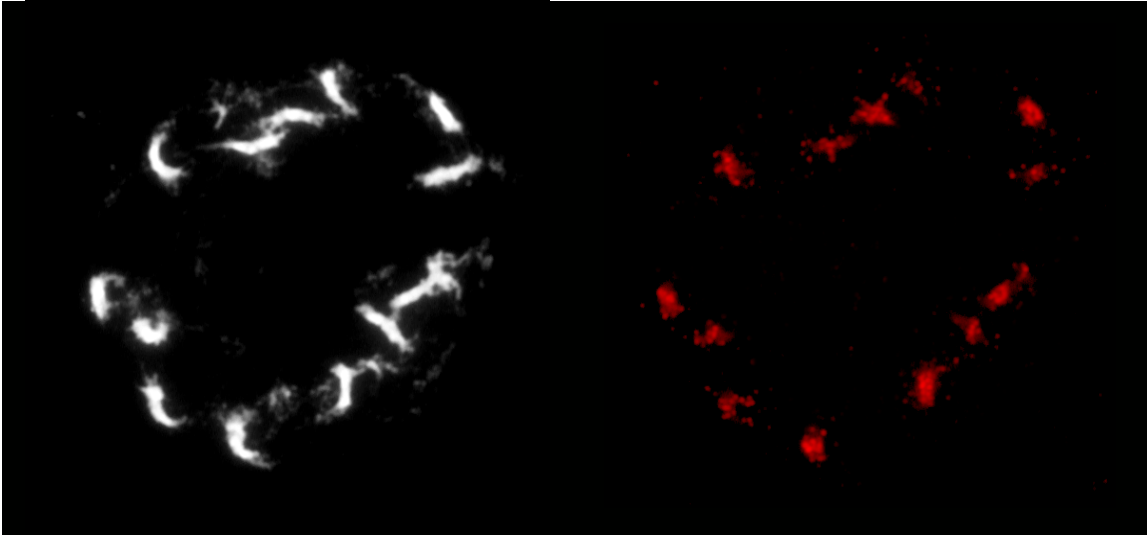**B**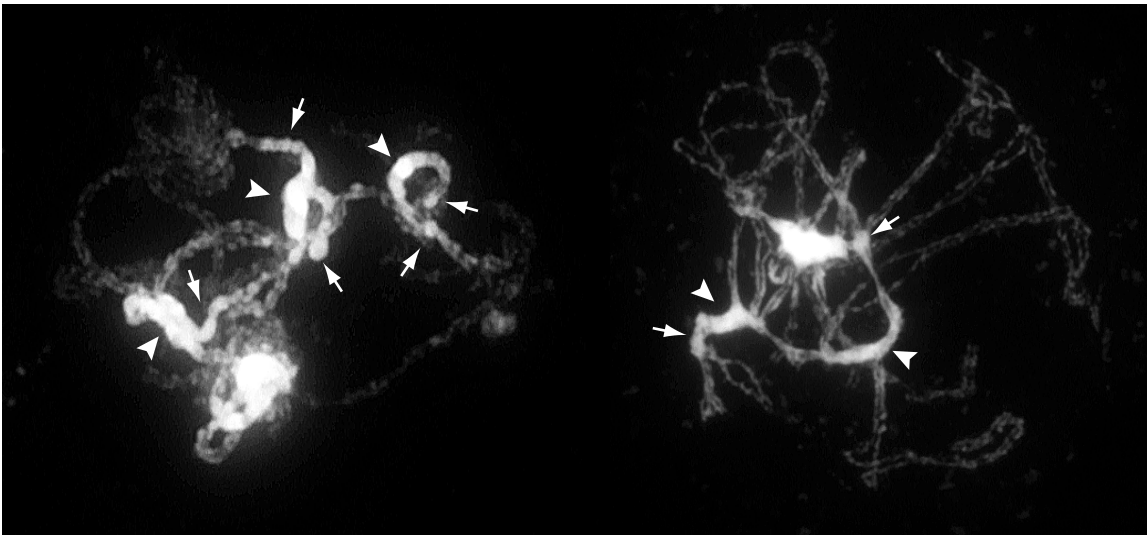

**Supplemental Figure 3. Heterochromatic Landmarks in *Ochthodium aegyptiacum* and *Thellungiella halophila*.** (A) Fourteen 5S rDNA loci (red) localized on mitotic chromosomes of *O. aegyptiacum* ( $2n=14$ ). (B) DAPI-stained pachytene chromosomes of *T. halophila* ( $2n=14$ ) with large arrays of pericentromeric and interstitial heterochromatin. Arrowheads and arrows point to the position of centromeres and prominent heterochromatic arrays, respectively.

**Supplemental Table 1. Genomic Blocks of the Ancestral Crucifer Karyotype and Corresponding *Arabidopsis thaliana* BAC Contigs Used as Painting Probes in the Present Study.**

| Ancestral Chromosome <sup>a</sup> | Genomic Block <sup>a</sup> | Size (Mb) <sup>b</sup> | Boundary <i>A. thaliana</i> BAC Clones <sup>b</sup><br>(inc. GeneBank Accession Nos.) | <i>A. thaliana</i> Chromosome <sup>b</sup> |
|-----------------------------------|----------------------------|------------------------|---------------------------------------------------------------------------------------|--------------------------------------------|
| AK1                               | <b>A</b>                   | 6.7                    | T25K16 (AC007323) - T29M8 (AC069143)                                                  | At1                                        |
| AK1                               | <b>B</b>                   | 5.7                    | F5M15 (AC027665) - F12K21 (AC023279)                                                  | At1                                        |
| AK1                               | <b>C</b>                   | 4.6                    | F2J6 (AC009526) T6H22 (AC009894)                                                      | At1                                        |
| AK2                               | <b>D</b>                   | 2.3                    | F12K22 (AC079732) - T12P18 (AC010852)                                                 | At1                                        |
| AK2                               | <b>E</b>                   | 6.2                    | T23K8 (AC007230) - F23A5 (AC011713)                                                   | At1                                        |
| AK3                               | <b>F</b>                   | 9.2                    | T4P13 (AC008261) - MWL2 (AB025629)                                                    | At3                                        |
| AK3                               | <b>G</b>                   | 1.3                    | F1O13 (AC007211) -T25N22 (AC005693)                                                   | At2                                        |
| AK3                               | <b>H</b>                   | 3.2                    | T10F5 (AC007063) - F11A3 (AC006569)                                                   | At2                                        |
| AK4                               | <b>I</b>                   | 2.1                    | F3K23 (AC006841) - T19L18 (AC004747)                                                  | At2                                        |
| AK4                               | <b>J</b>                   | 8.2                    | F18A8 (AC003105) - T8I3 (AC002337)                                                    | At2                                        |
| AK5                               | <b>K</b>                   | 0.4                    | F2I9 (AC005560) - F3C11 (AC007167)                                                    | At2                                        |
| AK5                               | <b>L</b>                   | 2.9                    | MJL14 (AP000601) - T4A2 (AP002066)                                                    | At2                                        |
| AK5                               | <b>M</b>                   | 2.7                    | T10D17 (AL353865) - F3A4 (AL132978)                                                   | At2                                        |
| AK5                               | <b>N</b>                   | 4.4                    | F24M12 (AL132980) - F16M2 (AL138648)                                                  | At2                                        |
| AK6                               | <b>O</b>                   | 2.5                    | F6N15 (AF069299) - T1J1 (AF128393)                                                    | At4                                        |
| AK6                               | <b>P</b>                   | 1.3                    | T3H13 (AF128396) - F8L21 (AL096882)                                                   | At4                                        |
| AK6                               | <b>Q</b>                   | 2.6                    | T20O7 (AB026660 ) - T8M17 (AF296835)                                                  | At5                                        |
| AK6                               | <b>R</b>                   | 7.4                    | F7J8 (AL137189) - T6G21 (AL090689)                                                    | At5                                        |
| AK7                               | <b>S</b>                   | 2.4                    | F5H8 (AB025605) - MJC20 (AB017067)                                                    | At5                                        |
| AK7                               | <b>T</b>                   | 1.1                    | F25E4 (AL050399) - F18A5 (AL035528)                                                   | At4                                        |
| AK7                               | <b>U</b>                   | 8.7                    | T6K21 (AL021889) - T5J17 (AL035708)                                                   | At4                                        |
| AK8                               | <b>V</b>                   | 2.4                    | MBD2 (AB008264) - K23F3 (AP000372)                                                    | At5                                        |
| AK8                               | <b>W</b>                   | 4.3                    | K21P3 (AB016872) - MMN10 (AB015475)                                                   | At5                                        |
| AK8                               | <b>X</b>                   | 2.5                    | MSL3 (AB008269) - K9I9 (AB013390)                                                     | At5                                        |

<sup>a</sup> Ancestral chromosomes (AK1-8) and 24 genomic blocks (A-X) of the Ancestral Crucifer Karyotype (Schranz et al., Trends Plant Sci. 11: 535–542, 2006).

<sup>b</sup> <http://www.arabidopsis.org>

**Supplemental Table 2. Relative Length of Genomic Blocks (GBs) in the Eight x=7 Analyzed Species.**

Relative length of GBs is given as a ratio between the measured length of a GB and the sum of all GB lengths in a given species.

| Genomic <sup>a</sup><br>Block | <i>Myagrurn<br/>perfoliatum</i> | <i>Thellungiella<br/>halophila</i> | <i>Ochthodium<br/>aegyptiacum</i> | <i>Glastaria<br/>glastifolia</i> | <i>Noccaea<br/>caerulescens</i> | <i>Conringia<br/>orientalis</i> | <i>Calepina<br/>irregularis</i> | <i>Goldbachia<br/>laevigata</i> |
|-------------------------------|---------------------------------|------------------------------------|-----------------------------------|----------------------------------|---------------------------------|---------------------------------|---------------------------------|---------------------------------|
| A                             | 0.068                           | 0.065                              | 0.059                             | 0.066                            | 0.064                           | 0.089                           | 0.091                           | 0.073                           |
| B                             | 0.055                           | 0.065                              | 0.049                             | 0.053                            | 0.052                           | 0.073                           | 0.072                           | 0.055                           |
| C                             | 0.034                           | 0.032                              | 0.034                             | 0.029                            | 0.031                           | 0.047                           | 0.038                           | 0.027                           |
| D                             | 0.027                           | 0.025                              | 0.029                             | 0.025                            | 0.040                           | 0.035                           | 0.034                           | 0.064                           |
| E                             | 0.072                           | 0.058                              | 0.107                             | 0.066                            | 0.076                           | 0.079                           | 0.098                           | 0.109                           |
| F                             | 0.106                           | 0.104                              | 0.117                             | 0.127                            | 0.116                           | 0.104                           | 0.140                           | 0.136                           |
| G                             | 0.007                           | 0.004                              | 0.010                             | 0.008                            | 0.006                           | 0.006                           | 0.004                           | 0.005                           |
| H                             | 0.027                           | 0.025                              | 0.029                             | 0.029                            | 0.024                           | 0.032                           | 0.045                           | 0.032                           |
| I                             | 0.017                           | 0.022                              | 0.020                             | 0.037                            | 0.012                           | 0.028                           | 0.030                           | 0.023                           |
| J                             | 0.079                           | 0.090                              | 0.068                             | 0.094                            | 0.080                           | 0.066                           | 0.091                           | 0.100                           |
| K                             | 0.007                           | 0.011                              | 0.010                             | 0.016                            | 0.018                           | 0.009                           | 0.008                           | 0.009                           |
| L                             | 0.017                           | 0.014                              | 0.020                             | 0.012                            | 0.015                           | 0.019                           | 0.019                           | 0.023                           |
| M                             | 0.041                           | 0.025                              | 0.029                             | 0.029                            | 0.031                           | 0.025                           | 0.027                           | 0.023                           |
| N                             | 0.065                           | 0.058                              | 0.059                             | 0.053                            | 0.058                           | 0.047                           | 0.049                           | 0.064                           |
| O                             | 0.021                           | 0.022                              | 0.024                             | 0.025                            | 0.015                           | 0.019                           | 0.023                           | 0.027                           |
| P                             | 0.017                           | 0.018                              | 0.015                             | 0.012                            | 0.021                           | 0.016                           | 0.015                           | 0.014                           |
| Q                             | 0.021                           | 0.014                              | 0.020                             | 0.016                            | 0.021                           | 0.032                           | 0.023                           | 0.023                           |
| R                             | 0.079                           | 0.112                              | 0.083                             | 0.078                            | 0.092                           | 0.057                           | 0.091                           | 0.091                           |
| S                             | 0.031                           | 0.036                              | 0.024                             | 0.025                            | 0.028                           | 0.019                           | n.a. <sup>b</sup>               | n.a.                            |
| T                             | 0.007                           | 0.004                              | 0.005                             | 0.012                            | 0.006                           | 0.006                           | n.a.                            | n.a.                            |
| U                             | 0.096                           | 0.097                              | 0.088                             | 0.098                            | 0.110                           | 0.082                           | n.a.                            | n.a.                            |
| V                             | 0.024                           | 0.022                              | 0.029                             | 0.025                            | 0.021                           | 0.032                           | 0.027                           | 0.027                           |
| W                             | 0.055                           | 0.054                              | 0.044                             | 0.041                            | 0.040                           | 0.041                           | 0.045                           | 0.045                           |
| X                             | 0.027                           | 0.025                              | 0.029                             | 0.025                            | 0.021                           | 0.035                           | 0.030                           | 0.032                           |

<sup>a</sup> 24 GBs (A-X) of the Ancestral Crucifer Karyotype (Schranz et al., Trends Plant Sci. 11: 535–542, 2006).

<sup>b</sup> n.a. (= not analyzed).
